# Supplementary material for: Holocene dynamics in the Bering Strait inflow to the Arctic and the Beaufort Gyre circulation based on sedimentary records from the Chukchi Sea
Source: Copernicus journal article supplement (doi:10.5194/cp-2016-105), 2016-10-31
Supplement: Supplementary file 1 [file cp-2016-105-supplement.pdf]

Supplementary table 1. The quartz/feldspar (Q/S) and Q/S with logarithmic function (log Q/S), (chlorite + kaolinite)/illite (CK/I) and chlorite/illite (C/I) ratios in bulk fraction of the Beaufort Sea surface sediments

| Cruise | Station | Latitude<br>(°N) | Longitude<br>(°E) | Water        | Q/F   | Log  |       |      |
|--------|---------|------------------|-------------------|--------------|-------|------|-------|------|
|        |         |                  |                   | depth<br>(m) |       | Q/F  | C+K/I | C/I  |
| ARA4C  | 01MUC1B | 71.8987          | -154.0939         | 257          | 14.22 | 1.15 | 1.52  | 0.79 |
| ARA4C  | 02MUC2B | 71.8970          | -154.0826         | 235          | 16.17 | 1.21 | 1.50  | 0.60 |
| ARA4C  | 04MUC2B | 71.6348          | -152.4005         | 282          | 15.87 | 1.20 | 1.62  | 0.65 |
| ARA4C  | 07MUC2B | 69.9917          | -137.8675         | 127          | 22.47 | 1.35 | 1.17  | 0.47 |
| ARA4C  | 25MUC2B | 70.6147          | -135.6457         | 75           | 23.70 | 1.37 | 1.16  | 0.50 |
| ARA4C  | 26MUC3B | 70.6600          | -135.5461         | 97           | 40.72 | 1.61 | 1.16  | 0.50 |
| ARA4C  | 27MUC1B | 70.7895          | -135.5662         | 419          | 20.83 | 1.32 | 0.83  | 0.24 |
| ARA4C  | 32MUC1B | 70.9849          | -134.6047         | 260          | 21.13 | 1.32 | 1.13  | 0.52 |
| ARA4C  | 37MUC1B | 70.6338          | -139.3676         | 1173         | 18.63 | 1.27 | 1.23  | 0.50 |
| ARA4C  | 38MUCB  | 70.6534          | -138.7913         | 1194         | 19.53 | 1.29 | 1.19  | 0.53 |
| ARA4C  | 40MUC1B | 70.1339          | -138.7000         | 331          | 25.61 | 1.41 | 1.13  | 0.39 |
| ARA4C  | 43MUC2B | 69.9710          | -137.2299         | 57           | 25.66 | 1.41 | 1.09  | 0.50 |
| ARA5B  | 01BOXB  | 70.7890          | -135.5675         | 420          | 15.90 | 1.20 | 0.90  | 0.39 |
| ARA5B  | 02BOXB  | 70.7058          | -135.5675         | 410          | 19.60 | 1.29 | 1.10  | 0.31 |
| ARA5B  | 10BOXB  | 70.6495          | -135.9458         | 277          | 21.73 | 1.34 | 1.31  | 0.49 |
| ARA5B  | 17BOXB  | 70.8567          | -136.2112         | 848          | 18.58 | 1.27 | 1.13  | 0.52 |
| ARA5B  | 18BOXB  | 70.8018          | -136.0977         | 740          | 19.54 | 1.29 | 1.17  | 0.49 |
| ARA5B  | 33BOXB  | 70.7552          | -134.1577         |              | 18.30 | 1.26 | 1.19  | 0.51 |
| ARA5B  | 34BOXB  | 70.6045          | -134.8036         |              | 22.64 | 1.35 | 1.16  | 0.51 |

Supplementary table 2. The quartz/feldspar (Q/S) and Q/S with logarithmic function ( $\log Q/S$ ) of bulk fraction, and (chlorite + kaolinite)/illite (CK/I) and chlorite/illite (C/I) ratios of clay fraction in the core ARA02B 01A-GC.

| Leg    | Core  | Depth<br>(cm) | Age (ka)<br>$\Delta R=500$ | log   |      |      |      |
|--------|-------|---------------|----------------------------|-------|------|------|------|
|        |       |               |                            | Q/F   | Q/F  | CK/I | C/I  |
| ARA02B | 01-GC | 0             | 0.00                       | 8.00  | 0.90 | 1.04 | 0.60 |
| ARA02B | 01-GC | 5             | 0.14                       | 8.75  | 0.94 | 1.22 | 0.64 |
| ARA02B | 01-GC | 10            | 0.28                       | 6.45  | 0.81 | 1.20 | 0.69 |
| ARA02B | 01-GC | 15            | 0.43                       | 7.62  | 0.88 | 1.14 | 0.54 |
| ARA02B | 01-GC | 20            | 0.57                       | 8.19  | 0.91 | 1.13 | 0.75 |
| ARA02B | 01-GC | 25            | 0.71                       | 8.66  | 0.94 | 1.35 | 0.70 |
| ARA02B | 01-GC | 30            | 0.85                       | 9.87  | 0.99 | 1.21 | 0.64 |
| ARA02B | 01-GC | 35            | 1.00                       | 7.62  | 0.88 | 1.21 | 0.66 |
| ARA02B | 01-GC | 40            | 1.14                       | 9.61  | 0.98 | 1.21 | 0.65 |
| ARA02B | 01-GC | 45            | 1.28                       | 8.23  | 0.92 | 1.19 | 0.68 |
| ARA02B | 01-GC | 50            | 1.42                       | 8.43  | 0.93 | 1.23 | 0.67 |
| ARA02B | 01-GC | 55            | 1.56                       | 9.01  | 0.95 | 1.20 | 0.68 |
| ARA02B | 01-GC | 60            | 1.71                       | 8.10  | 0.91 | 1.13 | 0.55 |
| ARA02B | 01-GC | 65            | 1.85                       | 8.54  | 0.93 | 1.19 | 0.63 |
| ARA02B | 01-GC | 70            | 1.99                       | 8.94  | 0.95 | 1.14 | 0.61 |
| ARA02B | 01-GC | 75            | 2.13                       | 8.74  | 0.94 | 1.24 | 0.71 |
| ARA02B | 01-GC | 80            | 2.27                       | 10.58 | 1.02 | 1.24 | 0.72 |
| ARA02B | 01-GC | 85            | 2.42                       | 8.48  | 0.93 | 1.12 | 0.53 |
| ARA02B | 01-GC | 90            | 2.56                       | 8.31  | 0.92 | 1.16 | 0.67 |
| ARA02B | 01-GC | 95            | 2.70                       | 8.99  | 0.95 | 1.01 | 0.58 |
| ARA02B | 01-GC | 100           | 2.84                       | 8.11  | 0.91 | 1.19 | 0.71 |
| ARA02B | 01-GC | 105           | 2.99                       | 8.42  | 0.93 | 1.07 | 0.60 |
| ARA02B | 01-GC | 110           | 3.09                       | 7.94  | 0.90 | 1.16 | 0.63 |
| ARA02B | 01-GC | 115           | 3.17                       | 10.22 | 1.01 | 1.23 | 0.77 |
| ARA02B | 01-GC | 120           | 3.25                       | 9.62  | 0.98 | 1.25 | 0.71 |
| ARA02B | 01-GC | 125           | 3.32                       | 9.38  | 0.97 | 1.12 | 0.60 |

|        |       |     |      |       |      |      |      |
|--------|-------|-----|------|-------|------|------|------|
| ARA02B | 01-GC | 130 | 3.40 | 9.44  | 0.97 | 1.17 | 0.70 |
| ARA02B | 01-GC | 135 | 3.47 | 8.61  | 0.93 | 1.16 | 0.69 |
| ARA02B | 01-GC | 140 | 3.55 | 9.14  | 0.96 | 1.29 | 0.71 |
| ARA02B | 01-GC | 145 | 3.62 | 9.68  | 0.99 | 1.17 | 0.66 |
| ARA02B | 01-GC | 150 | 3.70 | 9.07  | 0.96 | 1.28 | 0.79 |
| ARA02B | 01-GC | 155 | 3.77 | 9.74  | 0.99 | 1.23 | 0.69 |
| ARA02B | 01-GC | 160 | 3.85 | 8.57  | 0.93 | 1.32 | 0.73 |
| ARA02B | 01-GC | 165 | 3.92 | 8.89  | 0.95 | 1.12 | 0.75 |
| ARA02B | 01-GC | 170 | 3.99 | 9.73  | 0.99 | 1.31 | 0.73 |
| ARA02B | 01-GC | 175 | 4.06 | 9.52  | 0.98 | 1.28 | 0.74 |
| ARA02B | 01-GC | 180 | 4.13 | 10.27 | 1.01 | 1.16 | 0.70 |
| ARA02B | 01-GC | 185 | 4.20 | 9.19  | 0.96 | 1.11 | 0.69 |
| ARA02B | 01-GC | 190 | 4.28 | 10.09 | 1.00 | 1.21 | 0.79 |
| ARA02B | 01-GC | 195 | 4.35 | 9.18  | 0.96 | 1.11 | 0.74 |
| ARA02B | 01-GC | 200 | 4.42 | 8.89  | 0.95 | 1.27 | 0.67 |
| ARA02B | 01-GC | 205 | 4.49 | 10.93 | 1.04 | 1.29 | 0.79 |
| ARA02B | 01-GC | 210 | 4.54 | 9.37  | 0.97 | 1.16 | 0.72 |
| ARA02B | 01-GC | 215 | 4.60 | 9.46  | 0.98 | 1.22 | 0.65 |
| ARA02B | 01-GC | 221 | 4.65 | 8.78  | 0.94 | 1.21 | 0.73 |
| ARA02B | 01-GC | 225 | 4.71 | 9.34  | 0.97 | 1.10 | 0.60 |
| ARA02B | 01-GC | 230 | 4.76 | 10.15 | 1.01 | 1.12 | 0.66 |
| ARA02B | 01-GC | 235 | 4.82 | 8.63  | 0.94 | 1.12 | 0.74 |
| ARA02B | 01-GC | 240 | 4.88 | 8.23  | 0.92 | 1.23 | 0.68 |
| ARA02B | 01-GC | 245 | 4.93 | 8.03  | 0.90 | 1.16 | 0.71 |
| ARA02B | 01-GC | 250 | 4.98 | 9.49  | 0.98 | 1.14 | 0.63 |
| ARA02B | 01-GC | 255 | 5.03 | 8.01  | 0.90 | 1.25 | 0.64 |
| ARA02B | 01-GC | 260 | 5.08 | 9.39  | 0.97 | 1.29 | 0.69 |
| ARA02B | 01-GC | 265 | 5.14 | 8.11  | 0.91 | 1.27 | 0.67 |
| ARA02B | 01-GC | 270 | 5.19 | 8.47  | 0.93 | 1.25 | 0.71 |
| ARA02B | 01-GC | 275 | 5.24 | 9.72  | 0.99 | 1.22 | 0.68 |
| ARA02B | 01-GC | 280 | 5.29 | 10.14 | 1.01 | 1.20 | 0.72 |
| ARA02B | 01-GC | 285 | 5.34 | 8.42  | 0.93 | 1.05 | 0.64 |

|        |       |     |      |       |      |      |      |
|--------|-------|-----|------|-------|------|------|------|
| ARA02B | 01-GC | 290 | 5.39 | 10.17 | 1.01 | 1.17 | 0.68 |
| ARA02B | 01-GC | 295 | 5.45 | 9.31  | 0.97 | 1.16 | 0.64 |
| ARA02B | 01-GC | 300 | 5.50 | 8.90  | 0.95 | 1.13 | 0.61 |
| ARA02B | 01-GC | 305 | 5.55 | 8.84  | 0.95 | 1.21 | 0.65 |
| ARA02B | 01-GC | 310 | 5.60 | 9.00  | 0.95 | 1.30 | 0.68 |
| ARA02B | 01-GC | 315 | 5.65 | 10.96 | 1.04 | 1.14 | 0.67 |
| ARA02B | 01-GC | 320 | 5.71 | 10.93 | 1.04 | 1.18 | 0.69 |
| ARA02B | 01-GC | 325 | 5.76 | 10.30 | 1.01 | 1.26 | 0.67 |
| ARA02B | 01-GC | 330 | 5.81 | 11.04 | 1.04 | 1.18 | 0.69 |
| ARA02B | 01-GC | 335 | 5.86 | 10.37 | 1.02 | 1.19 | 0.69 |
| ARA02B | 01-GC | 340 | 5.91 | 10.94 | 1.04 | 1.15 | 0.69 |
| ARA02B | 01-GC | 345 | 5.96 | 10.98 | 1.04 | 1.15 | 0.63 |
| ARA02B | 01-GC | 350 | 6.03 | 11.15 | 1.05 | 1.13 | 0.64 |
| ARA02B | 01-GC | 355 | 6.10 | 10.67 | 1.03 | 1.13 | 0.69 |
| ARA02B | 01-GC | 360 | 6.18 | 10.60 | 1.03 | 1.04 | 0.62 |
| ARA02B | 01-GC | 365 | 6.26 | 11.48 | 1.06 | 1.23 | 0.73 |
| ARA02B | 01-GC | 370 | 6.33 | 9.42  | 0.97 | 1.31 | 0.77 |
| ARA02B | 01-GC | 375 | 6.41 | 11.50 | 1.06 | 1.22 | 0.72 |
| ARA02B | 01-GC | 380 | 6.48 | 10.59 | 1.02 | 1.08 | 0.69 |
| ARA02B | 01-GC | 385 | 6.56 | 7.68  | 0.89 | 1.14 | 0.63 |
| ARA02B | 01-GC | 390 | 6.64 | 10.27 | 1.01 | 1.18 | 0.61 |
| ARA02B | 01-GC | 395 | 6.71 | 9.53  | 0.98 | 1.16 | 0.67 |
| ARA02B | 01-GC | 400 | 6.79 | 11.28 | 1.05 | 1.15 | 0.70 |
| ARA02B | 01-GC | 405 | 6.86 | 9.67  | 0.99 | 1.21 | 0.67 |
| ARA02B | 01-GC | 410 | 6.94 | 11.39 | 1.06 | 1.18 | 0.67 |
| ARA02B | 01-GC | 415 | 7.01 | 12.02 | 1.08 | 1.19 | 0.62 |
| ARA02B | 01-GC | 420 | 7.09 | 10.75 | 1.03 | 1.20 | 0.66 |
| ARA02B | 01-GC | 425 | 7.17 | 10.86 | 1.04 | 1.20 | 0.68 |
| ARA02B | 01-GC | 430 | 7.24 | 11.37 | 1.06 | 1.05 | 0.66 |
| ARA02B | 01-GC | 435 | 7.32 | 9.71  | 0.99 | 1.16 | 0.66 |
| ARA02B | 01-GC | 440 | 7.39 | 10.10 | 1.00 | 1.20 | 0.65 |
| ARA02B | 01-GC | 445 | 7.47 | 9.44  | 0.98 | 1.17 | 0.68 |

|        |       |     |      |       |      |      |      |
|--------|-------|-----|------|-------|------|------|------|
| ARA02B | 01-GC | 450 | 7.55 | 11.33 | 1.05 | 1.20 | 0.71 |
| ARA02B | 01-GC | 455 | 7.62 | 9.78  | 0.99 | 1.16 | 0.68 |
| ARA02B | 01-GC | 460 | 7.71 | 9.81  | 0.99 | 1.19 | 0.60 |
| ARA02B | 01-GC | 465 | 7.80 | 12.81 | 1.11 | 1.10 | 0.70 |
| ARA02B | 01-GC | 470 | 7.90 | 10.44 | 1.02 | 1.13 | 0.65 |
| ARA02B | 01-GC | 475 | 7.99 | 14.79 | 1.17 | 1.28 | 0.69 |
| ARA02B | 01-GC | 480 | 8.09 | 11.85 | 1.07 | 1.22 | 0.69 |
| ARA02B | 01-GC | 485 | 8.18 | 10.87 | 1.04 | 1.15 | 0.64 |
| ARA02B | 01-GC | 490 | 8.27 | 12.61 | 1.10 | 1.15 | 0.69 |
| ARA02B | 01-GC | 495 | 8.37 | 10.42 | 1.02 | 1.19 | 0.60 |
| ARA02B | 01-GC | 500 | 8.46 | 10.86 | 1.04 | 1.12 | 0.66 |
| ARA02B | 01-GC | 505 | 8.56 | 12.88 | 1.11 | 1.23 | 0.58 |
| ARA02B | 01-GC | 510 | 8.65 | 10.80 | 1.03 | 1.14 | 0.61 |
| ARA02B | 01-GC | 515 | 8.75 | 12.90 | 1.11 | 1.15 | 0.73 |
| ARA02B | 01-GC | 520 | 8.84 | 13.25 | 1.12 | 1.11 | 0.52 |
| ARA02B | 01-GC | 525 | 8.93 | 14.60 | 1.16 | 1.26 | 0.59 |
| ARA02B | 01-GC | 530 | 9.03 | 17.39 | 1.24 | 1.07 | 0.56 |
| ARA02B | 01-GC | 535 | 9.12 | 11.31 | 1.05 | 1.19 | 0.64 |
| ARA02B | 01-GC | 540 | 9.22 | 13.50 | 1.13 | 1.12 | 0.68 |
| ARA02B | 01-GC | 545 | 9.31 | 10.86 | 1.04 | 1.04 | 0.54 |

---

Supplementary table 3. The quartz/feldspar (Q/S) and Q/S with logarithmic function (log Q/S), (chlorite + kaolinite)/illite (CK/I) and chlorite/illite (C/I) ratios of bulk fraction in the core HLY0501-5JPC/TC

| Leg      | Core | Age (kyr)            |                   | Q/F   | log Q/F | CK/I | C/I  |
|----------|------|----------------------|-------------------|-------|---------|------|------|
|          |      | Composite depth (cm) | $\Delta R=0$ (ka) |       |         |      |      |
| HLY05-01 | 5TC  | 9                    | 0.08              | 7.13  | 0.85    | 1.20 | 0.75 |
| HLY05-01 | 5TC  | 25                   | 0.33              | 6.32  | 0.80    | 1.23 | 0.77 |
| HLY05-01 | 5TC  | 52                   | 0.74              | 7.24  | 0.86    | 1.29 | 0.59 |
| HLY05-01 | 5JPC | 76                   | 1.11              | 7.15  | 0.85    | 1.39 | 0.74 |
| HLY05-01 | 5TC  | 100                  | 1.48              | 8.22  | 0.92    | 1.42 | 0.78 |
| HLY05-01 | 5JPC | 136                  | 1.73              | 8.22  | 0.92    | 1.19 | 0.66 |
| HLY05-01 | 5TC  | 150                  | 1.90              | 8.52  | 0.93    | 1.26 | 0.73 |
| HLY05-01 | 5JPC | 160                  | 2.00              | 7.88  | 0.90    | 1.43 | 0.82 |
| HLY05-01 | 5JPC | 173                  | 2.01              | 7.86  | 0.90    | 1.22 | 0.71 |
| HLY05-01 | 5JPC | 175                  | 2.17              | 7.61  | 0.88    | 1.28 | 0.75 |
| HLY05-01 | 5JPC | 197                  | 2.24              | 7.49  | 0.87    | 1.20 | 0.61 |
| HLY05-01 | 5TC  | 200                  | 2.34              | 7.87  | 0.90    | 1.40 | 0.71 |
| HLY05-01 | 5JPC | 221                  | 2.36              | 8.12  | 0.91    | 1.42 | 0.80 |
| HLY05-01 | 5JPC | 223                  | 2.57              | 6.73  | 0.83    | 1.25 | 0.79 |
| HLY05-01 | 5TC  | 248                  | 2.80              | 8.44  | 0.93    | 1.30 | 0.78 |
| HLY05-01 | 5JPC | 253                  | 3.01              | 6.73  | 0.83    | 1.25 | 0.79 |
| HLY05-01 | 5JPC | 285                  | 3.20              | 9.29  | 0.97    | 1.36 | 0.87 |
| HLY05-01 | 5JPC | 342                  | 3.55              | 7.72  | 0.89    | 1.32 | 0.70 |
| HLY05-01 | 5JPC | 392                  | 3.60              | 7.79  | 0.89    | 1.22 | 0.62 |
| HLY05-01 | 5JPC | 398                  | 3.74              | 9.30  | 0.97    | 1.20 | 0.82 |
| HLY05-01 | 5JPC | 462                  | 4.05              | 9.23  | 0.97    | 1.42 | 0.87 |
| HLY05-01 | 5JPC | 523                  | 4.48              | 10.09 | 1.00    | 1.45 | 0.91 |
| HLY05-01 | 5JPC | 575                  | 4.81              | 7.65  | 0.88    | 1.28 | 0.73 |
| HLY05-01 | 5JPC | 611                  | 5.00              | 8.01  | 0.90    | 1.30 | 0.73 |
| HLY05-01 | 5JPC | 630                  | 5.08              | 7.98  | 0.90    | 1.27 | 0.59 |

|          |      |      |       |       |      |      |      |
|----------|------|------|-------|-------|------|------|------|
| HLY05-01 | 5JPC | 680  | 5.30  | 9.46  | 0.98 | 1.34 | 0.80 |
| HLY05-01 | 5JPC | 775  | 5.73  | 9.22  | 0.96 | 1.33 | 0.80 |
| HLY05-01 | 5JPC | 823  | 6.04  | 9.28  | 0.97 | 1.34 | 0.76 |
| HLY05-01 | 5JPC | 855  | 6.25  | 8.47  | 0.93 | 1.26 | 0.64 |
| HLY05-01 | 5JPC | 951  | 6.93  | 10.23 | 1.01 | 1.44 | 0.81 |
| HLY05-01 | 5JPC | 975  | 7.10  | 8.27  | 0.92 | 1.17 | 0.75 |
| HLY05-01 | 5JPC | 978  | 7.12  | 11.43 | 1.06 | 1.24 | 0.73 |
| HLY05-01 | 5JPC | 1023 | 7.43  | 10.29 | 1.01 | 1.37 | 0.84 |
| HLY05-01 | 5JPC | 1055 | 7.66  | 9.96  | 1.00 | 1.08 | 0.69 |
| HLY05-01 | 5JPC | 1096 | 7.94  | 11.38 | 1.06 | 1.31 | 0.83 |
| HLY05-01 | 5JPC | 1098 | 7.96  | 9.67  | 0.99 | 1.16 | 0.83 |
| HLY05-01 | 5JPC | 1120 | 8.11  | 7.53  | 0.88 | 1.33 | 0.85 |
| HLY05-01 | 5JPC | 1144 | 8.28  | 10.77 | 1.03 | 1.27 | 0.77 |
| HLY05-01 | 5JPC | 1192 | 8.62  | 13.96 | 1.15 | 1.14 | 0.62 |
| HLY05-01 | 5JPC | 1215 | 8.79  | 11.19 | 1.05 | 1.26 | 0.76 |
| HLY05-01 | 5JPC | 1238 | 8.95  | 12.94 | 1.11 | 1.10 | 0.65 |
| HLY05-01 | 5JPC | 1262 | 9.12  | 10.36 | 1.02 | 1.23 | 0.75 |
| HLY05-01 | 5JPC | 1286 | 9.29  | 11.95 | 1.08 | 1.26 | 0.78 |
| HLY05-01 | 5JPC | 1310 | 9.46  | 10.33 | 1.01 | 1.31 | 0.82 |
| HLY05-01 | 5JPC | 1353 | 10.98 | 10.00 | 1.00 | 1.19 | 0.61 |
| HLY05-01 | 5JPC | 1376 | 11.85 | 23.13 | 1.36 | 1.34 | 0.78 |
| HLY05-01 | 5JPC | 1425 | 12.62 | 9.79  | 0.99 | 1.02 | 0.59 |
| HLY05-01 | 5JPC | 1522 | 13.93 | 14.48 | 1.16 | 1.22 | 0.80 |
| HLY05-01 | 5JPC | 1591 | 14.86 | 7.76  | 0.89 | 1.34 | 0.75 |
| HLY05-01 | 5JPC | 1610 | 15.12 | 7.79  | 0.89 | 1.44 | 0.88 |

---
